# Supplementary material for: Effect of polymer nanolayers on tin-chalcogenide nanosheet/conductive polymer flexible composite films and their enhanced thermoelectric performance
Source: Royal Society of Chemistry journal article supplement (doi:10.1039/c9nr01345h), 2019-01-01
Supplement: c9nr01345h1.pdf [file c9nr01345h1.pdf]

**Electronic Supplementary Information:**

**Effect of polymer nanolayer in tin-chalcogenide nanosheet/conductive  
polymer flexible composite films and their enhanced thermoelectric  
performance**

Hyun Ju, Dabin Park, and Jooheon Kim\*

School of Chemical Engineering & Materials Science,  
Chung-Ang University, Seoul 06974, Republic of Korea

\*Corresponding author: jooheonkim@cau.ac.kr (J. Kim)

Supporting Information Contents:

1. Figures
2. Tables

## 1. Figures

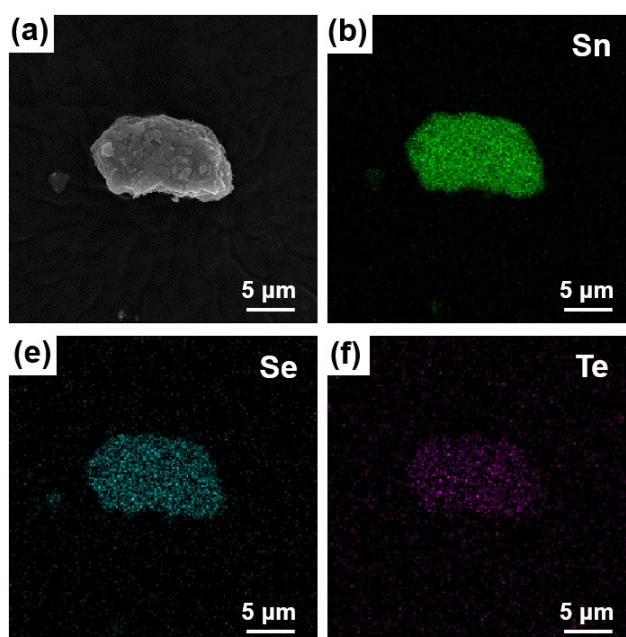

**Fig. S1** FE-SEM image and the corresponding EDS elemental mappings of  $\text{SnSe}_{0.97}\text{Te}_{0.03}$  powder.

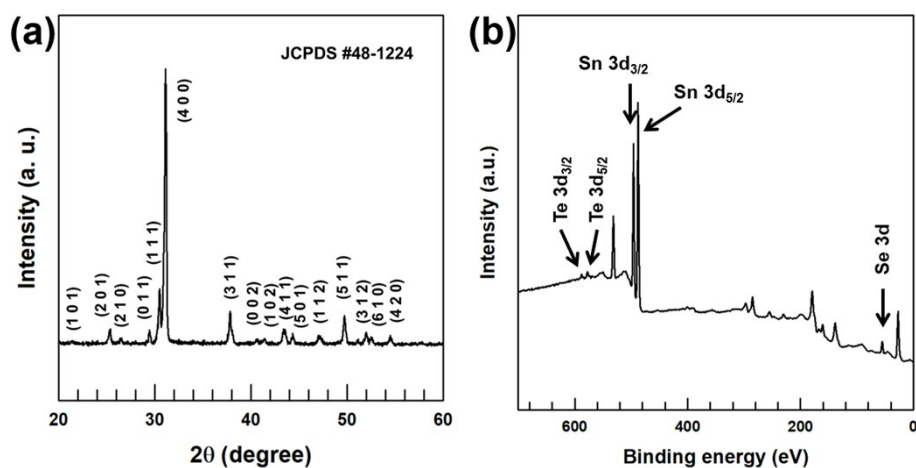

**Fig. S2** (a) XRD result of the SnSe nanosheets (JCPDS # 48-1224) and (b) XPS wide-scan spectrum of the  $\text{SnSe}_{0.97}\text{Te}_{0.03}$  nanosheets.

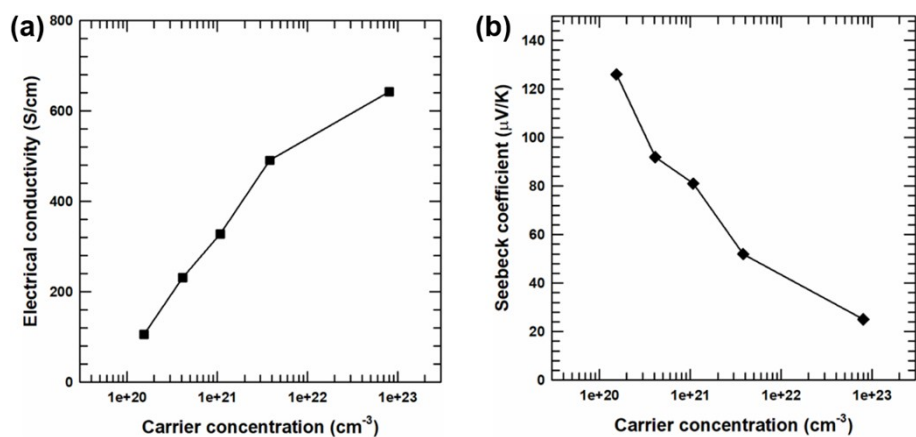

**Fig. S3** (a) Electrical conductivity and (b) Seebeck coefficient values of the PEDOT-coated  $\text{SnSe}_{0.97}\text{Te}_{0.03}$  nanosheet-x/PEDOT:PSS composites as a function of the carrier concentration.

## 2. Tables

|                                                       | $\sigma$<br>(S/cm) | $S$<br>( $\mu$ V/K) | $\kappa$<br>(W/m·K) | $S^2 \cdot \sigma$<br>(mW/m·K <sup>2</sup> ) | $ZT$                  |
|-------------------------------------------------------|--------------------|---------------------|---------------------|----------------------------------------------|-----------------------|
| SnSe <sub>0.97</sub> Te <sub>0.03</sub><br>nanosheets | 15.7               | 285                 | 0.68                | 127.5                                        | $5.87 \times 10^{-2}$ |
| SnSe <sub>0.97</sub> Te <sub>0.03</sub><br>powder     | 17.1               | 268                 | 0.75                | 122.8                                        | $5.13 \times 10^{-2}$ |

**Table S1** Measured and calculated thermoelectric properties for the SnSe<sub>0.97</sub>Te<sub>0.03</sub> nanosheets and SnSe<sub>0.97</sub>Te<sub>0.03</sub> powder. All the listed numbers are average values.

| Filler content | $n$                   | $\mu$                  |
|----------------|-----------------------|------------------------|
| (wt.%)         | (cm <sup>-3</sup> )   | (cm <sup>2</sup> /V·s) |
| 0              | 8.03×10 <sup>22</sup> | 0.05                   |
| 10             | 3.83×10 <sup>21</sup> | 0.8                    |
| 20             | 1.08×10 <sup>21</sup> | 1.9                    |
| 30             | 4.12×10 <sup>20</sup> | 3.5                    |
| 50             | 1.54×10 <sup>20</sup> | 4.3                    |

**Table S2** Carrier concentration and mobility values of PEDOT-coated SnSe<sub>0.97</sub>Te<sub>0.03</sub> nanosheet-x/PEDOT:PSS composites with different content of PEDOT-coated SnSe<sub>0.97</sub>Te<sub>0.03</sub> nanosheet.
